# Supplementary material for: A practical exact maximum compatibility algorithm for reconstruction of recent evolutionary history
Source: PubMed Central journal article supplement (PMC5324209; doi:10.1186/s12859-017-1520-4), 2017-02-23
Supplement: 12859_2017_1520_MOESM1_ESM.pdf [file 12859_2017_1520_MOESM1_ESM.pdf]

| Organism                | Cluster number | Number of Genomes | Columns in Input |        |             | Maximum Compatible Set(s) |        | Ambiguities in Binary Columns |                                      | Columns Not Fully Disambiguated |                               | Columns Represented on Tree |                      |                    | Execution time (sec.) |
|-------------------------|----------------|-------------------|------------------|--------|-------------|---------------------------|--------|-------------------------------|--------------------------------------|---------------------------------|-------------------------------|-----------------------------|----------------------|--------------------|-----------------------|
|                         |                |                   | Variable         | Binary | Informative | Size                      | Number | Fraction Ambiguous States     | Fraction of Columns with Ambiguities | Total                           | Informative and non-redundant | Number                      | Fraction of variable | Fraction of binary |                       |
| <i>Listeria</i>         | 1              | 570               | 3447             | 3445   | 1274        | 3431                      | 1      | 0.4%                          | 20.6%                                | 69                              | 0                             | 3362                        | 97.5%                | 97.6%              | 0.56                  |
|                         | 2              | 480               | 3043             | 3037   | 1190        | 3036                      | 1      | 0.6%                          | 6.2%                                 | 45                              | 1                             | 2991                        | 98.3%                | 98.5%              | 0.47                  |
|                         | 3              | 404               | 2440             | 2438   | 999         | 2431                      | 1      | 0.1%                          | 18.0%                                | 17                              | 0                             | 2414                        | 98.9%                | 99.0%              | 0.31                  |
|                         | 4              | 300               | 2743             | 2739   | 1013        | 2735                      | 1      | 0.1%                          | 5.0%                                 | 13                              | 0                             | 2722                        | 99.2%                | 99.4%              | 0.28                  |
|                         | 5              | 280               | 889              | 889    | 451         | 887                       | 1      | 0.1%                          | 6.3%                                 | 20                              | 9                             | 867                         | 97.5%                | 97.5%              | 0.17                  |
|                         | 6              | 247               | 2284             | 2284   | 715         | 2278                      | 1      | 0.1%                          | 5.1%                                 | 6                               | 1                             | 2272                        | 99.5%                | 99.5%              | 0.20                  |
|                         | 7              | 245               | 839              | 839    | 240         | 835                       | 1      | 0.5%                          | 17.6%                                | 44                              | 0                             | 791                         | 94.3%                | 94.3%              | 0.15                  |
|                         | 8              | 245               | 2131             | 2131   | 726         | 2130                      | 1      | 1.1%                          | 20.0%                                | 81                              | 2                             | 2049                        | 96.2%                | 96.2%              | 0.30                  |
|                         | 9              | 192               | 1429             | 1429   | 648         | 1427                      | 1      | 0.3%                          | 15.3%                                | 11                              | 0                             | 1416                        | 99.1%                | 99.1%              | 0.26                  |
|                         | 10             | 172               | 1511             | 1510   | 581         | 1499                      | 1      | 0.3%                          | 8.1%                                 | 17                              | 1                             | 1482                        | 98.1%                | 98.1%              | 0.25                  |
|                         | 11             | 164               | 1224             | 1224   | 414         | 1220                      | 1      | 0.2%                          | 7.4%                                 | 10                              | 0                             | 1210                        | 98.9%                | 98.9%              | 0.26                  |
|                         | 12             | 148               | 1176             | 1175   | 666         | 1171                      | 1      | 0.3%                          | 12.9%                                | 4                               | 0                             | 1167                        | 99.2%                | 99.3%              | 0.23                  |
|                         | 13             | 147               | 1555             | 1553   | 482         | 1553                      | 1      | 0.3%                          | 10.9%                                | 18                              | 0                             | 1535                        | 98.7%                | 98.8%              | 0.26                  |
|                         | 14             | 126               | 1120             | 1120   | 317         | 1116                      | 1      | 0.7%                          | 6.1%                                 | 18                              | 0                             | 1098                        | 98.0%                | 98.0%              | 0.25                  |
|                         | 15             | 125               | 217              | 217    | 49          | 217                       | 1      | 1.4%                          | 23.5%                                | 26                              | 3                             | 191                         | 88.0%                | 88.0%              | 0.18                  |
|                         | 16             | 101               | 1051             | 1051   | 348         | 1051                      | 1      | 0.1%                          | 2.5%                                 | 4                               | 1                             | 1047                        | 99.6%                | 99.6%              | 0.22                  |
| <i>Escherichia coli</i> | 1              | 617               | 6005             | 6004   | 2537        | 5938                      | 4      | 0.5%                          | 29.8%                                | 108.5                           | 1.5                           | 5830                        | 97.1%                | 97.1%              | 1.17                  |
|                         | 2              | 386               | 1891             | 1889   | 796         | 1731                      | 4      | 1.2%                          | 57.3%                                | 54                              | 5.5                           | 1677                        | 88.7%                | 88.8%              | 0.45                  |
|                         | 3              | 372               | 3749             | 3746   | 1282        | 3710                      | 1      | 1.7%                          | 50.4%                                | 178                             | 5                             | 3532                        | 94.2%                | 94.3%              | 0.81                  |
|                         | 4              | 307               | 3071             | 3067   | 1262        | 3030                      | 2      | 2.1%                          | 59.4%                                | 287.5                           | 1                             | 2743                        | 89.3%                | 89.4%              | 0.69                  |
|                         | 5              | 250               | 2468             | 2468   | 854         | 2458                      | 1      | 0.5%                          | 17.7%                                | 33                              | 2                             | 2425                        | 98.3%                | 98.3%              | 0.33                  |
|                         | 6              | 237               | 1074             | 1074   | 415         | 1066                      | 1      | 0.6%                          | 24.7%                                | 31                              | 5                             | 1035                        | 96.4%                | 96.4%              | 0.22                  |
|                         | 7              | 230               | 984              | 984    | 356         | 977                       | 1      | 0.5%                          | 14.9%                                | 20                              | 1                             | 957                         | 97.3%                | 97.3%              | 0.23                  |
|                         | 8              | 179               | 969              | 969    | 401         | 954                       | 2      | 0.7%                          | 25.6%                                | 19                              | 0                             | 935                         | 96.5%                | 96.5%              | 0.20                  |
|                         | 9              | 143               | 96               | 96     | 9           | 96                        | 1      | 1.4%                          | 18.8%                                | 17                              | 3                             | 79                          | 82.3%                | 82.3%              | 0.42                  |
|                         | 10             | 141               | 1044             | 1044   | 455         | 1031                      | 1      | 2.0%                          | 46.8%                                | 123                             | 0                             | 908                         | 87.0%                | 87.0%              | 0.28                  |
|                         | 11             | 131               | 2062             | 2062   | 752         | 2043                      | 1      | 0.6%                          | 14.9%                                | 17                              | 0                             | 2026                        | 98.3%                | 98.3%              | 0.23                  |
|                         | 12             | 116               | 69               | 69     | 39          | 69                        | 1      | 0.1%                          | 4.3%                                 | 1                               | 0                             | 68                          | 98.6%                | 98.6%              | 0.17                  |
|                         | 13             | 112               | 1303             | 1303   | 585         | 1290                      | 1      | 0.7%                          | 18.6%                                | 20                              | 1                             | 1270                        | 97.5%                | 97.5%              | 0.21                  |
|                         | 14             | 108               | 690              | 689    | 286         | 687                       | 1      | 0.4%                          | 7.8%                                 | 10                              | 0                             | 677                         | 98.1%                | 98.3%              | 0.23                  |

|                                |    |     |      |      |      |      |   |      |       |       |     |       |       |       |      |
|--------------------------------|----|-----|------|------|------|------|---|------|-------|-------|-----|-------|-------|-------|------|
|                                | 15 | 107 | 431  | 431  | 152  | 431  | 1 | 0.6% | 19.3% | 41    | 0   | 390   | 90.5% | 90.5% | 0.19 |
|                                | 16 | 102 | 808  | 808  | 389  | 804  | 1 | 0.9% | 19.4% | 25    | 0   | 779   | 96.4% | 96.4% | 0.19 |
| <i>Acinetobacter</i>           | 1  | 567 | 2768 | 2756 | 1101 | 2674 | 4 | 2.2% | 88.4% | 165.5 | 1.5 | 2509  | 90.6% | 91.0% | 0.88 |
|                                | 2  | 154 | 396  | 395  | 164  | 395  | 1 | 0.3% | 10.9% | 3     | 0   | 392   | 99.0% | 99.2% | 0.21 |
|                                | 3  | 125 | 1326 | 1322 | 425  | 1287 | 1 | 0.8% | 21.9% | 19    | 0   | 1268  | 95.6% | 95.9% | 0.24 |
| <i>Campylobacter</i>           | 1  | 195 | 818  | 818  | 274  | 798  | 1 | 2.9% | 74.1% | 36    | 3   | 762   | 93.2% | 93.2% | 0.20 |
|                                | 2  | 128 | 489  | 489  | 163  | 483  | 2 | 1.5% | 57.3% | 21    | 1   | 462   | 94.5% | 94.5% | 0.15 |
|                                | 3  | 103 | 662  | 661  | 175  | 648  | 1 | 3.3% | 71.0% | 74    | 5   | 574   | 86.7% | 86.8% | 0.16 |
| <i>Neisseria</i>               | 1  | 259 | 1239 | 1237 | 579  | 1196 | 1 | 2.8% | 65.5% | 78    | 2   | 1118  | 90.2% | 90.4% | 0.26 |
|                                | 2  | 142 | 887  | 887  | 403  | 836  | 2 | 2.9% | 58.1% | 72.5  | 2.5 | 763.5 | 86.1% | 86.1% | 0.20 |
| <i>Vibrio parahaemolyticus</i> | 1  | 112 | 1516 | 1512 | 434  | 1473 | 2 | 0.8% | 29.2% | 23.5  | 0   | 1450  | 95.6% | 95.9% | 0.25 |
| <i>Klebsiella</i>              | 1  | 296 | 2485 | 2478 | 889  | 2442 | 1 | 1.3% | 34.3% | 62    | 2   | 2380  | 95.8% | 96.0% | 0.49 |
| <i>Legionella pneumophila</i>  | 1  | 108 | 586  | 586  | 152  | 581  | 1 | 0.8% | 30.5% | 26    | 0   | 555   | 94.7% | 94.7% | 0.21 |

**Table S1.** Summary of results and performance on bacteria other than *Salmonella* .

Some counts are averages over multiple maximum compatible sets, and may therefore be non-integral.
